# Supplementary material for: Prevalence and risk factors for Plasmodium falciparum malaria in pregnant women attending antenatal clinic in Bobo-Dioulasso (Burkina Faso)
Source: Springer Nature journal article supplement (doi:10.1186/s12879-014-0631-z), 2014-11-18
Supplement: MOESM1 [file 9739266]

**Table 1 : Prevalence of maternal peripheral *P. falciparum* infection from 2004 to 2011 in Burkina Faso**

| <b>Prevalence of maternal peripheral <i>P. falciparum</i> infection</b>                                                   | <b>Type of study</b> | <b>Period of study</b>           | <b>Location</b> | <b>Age</b>                        | <b>Parity</b>                           | <b>Reference</b>    |
|---------------------------------------------------------------------------------------------------------------------------|----------------------|----------------------------------|-----------------|-----------------------------------|-----------------------------------------|---------------------|
| - 25.1 % (by microscopy) at ANC visit<br>- 19.4 % (by microscopy) at delivery                                             | Cross sectional      | June-<br>November<br>2004        | Rural           | Median age :<br>25 years          | All parity                              | Reviewed in<br>[5]  |
| - 23 % (by microscopy) at 32 weeks of gestation<br>- 23.2 % (by microscopy) at delivery                                   | Clinical trial       | 2004-2006                        | Rural           | Median age :<br>19 years          | All parity                              | Reviewed in<br>[6]  |
| - 20 % (by microscopy) at 32 weeks of gestation<br>- 18 % (by microscopy) at delivery                                     | Clinical trial       | 2004-2006                        | Rural           | No data                           | Primigravidae<br>and<br>secundigravidae | Reviewed in<br>[7]  |
| - 50.8% (by microscopy) at enrolment (1 <sup>st</sup> ANC visit)<br>- 21.9 % (by microscopy) at 2 <sup>nd</sup> ANC visit | Clinical trial       | April 2004<br>November<br>2005   | Rural           | Mean age :<br>23.7 ± 5.9<br>years | All parity                              | Reviewed in<br>[8]  |
| - 25.8 % (by microscopy) at delivery                                                                                      | Clinical trial       | April 2004<br>November<br>2005   | Rural           | Mean age :<br>23.7 ± 5.9<br>years | All parity                              | Reviewed in<br>[9]  |
| - 24 % (by microscopy) at ANC visit<br>- 30 % (by HRP2 RDT) at ANC visit                                                  | Cross sectional      | September-<br>October<br>2010    | Urban           | Mean age :<br>25 ± 5 years        | All parity                              | Reviewed in<br>[12] |
| - 30 % (by microscopy) at ANC visit<br>- 47 % (by HRP2 RDT) at ANC visit<br>- 53 % (by RT-PCR) at ANC visit               | Cross sectional      | November<br>2010-<br>August 2011 | Rural           | No data                           | All parity                              | Reviewed in<br>[13] |
